# Supplementary material for: The Trimeric Autotransporter Adhesin SadA from Salmonella spp. as a Novel Bacterial Surface Display System
Source: MDPI journal article supplement (doi:10.3390/vaccines12040399), 2024-04-09
Supplement: s1 [file s1]

Table S1. Bacterial strains and plasmids.

| Strain or plasmid               | Genotype or description                                                                                                                                                               | Reference or source |
|---------------------------------|---------------------------------------------------------------------------------------------------------------------------------------------------------------------------------------|---------------------|
| <b>Stains</b>                   |                                                                                                                                                                                       |                     |
| DH5 $\alpha$                    | Cloning strain                                                                                                                                                                        | CWBIO, China        |
| <i>S. typhimurium</i> 1.1174    | Wild-type <i>S. typhimurium</i>                                                                                                                                                       | This laboratory     |
| Stm $\Delta$ SadA               | <i>S. typhimurium</i> 1.1174 with <i>sadA</i> gene deletion                                                                                                                           | This work           |
| <i>B. anthracis</i> A16R        | pXO1+pXO2–, China vaccine strain, the strain for cloning the gene of PAD4.                                                                                                            | This laboratory     |
| <i>H. pylori</i> SS1            | Strain for cloning the gene of UreB.                                                                                                                                                  | This laboratory     |
| Stm $\Delta$ ygeA $\Delta$ murI | <i>S. typhimurium</i> 1.1174 with <i>ygeA</i> and <i>murI</i> genes double-deletion                                                                                                   | This work           |
| <b>Plasmids</b>                 |                                                                                                                                                                                       |                     |
| pUC57                           | <i>amp</i> , <i>P<sub>lac</sub></i> , used for synthesizing gene fragments commercially                                                                                               | Generalbiol, China  |
| pTrc99A                         | <i>amp</i> , <i>P<sub>trc</sub></i> , used for expressing the heterologous proteins with different SadA derivatives                                                                   | Lab collection      |
| pSadA-Flag $\times$ 3           | pTrc99A derivative containing <i>sadB</i> and <i>sadA</i> genes fused with the gene 3 $\times$ Flag-tag                                                                               | This work           |
| pSadBA-Flag $\times$ 3          | pTrc99A derivative containing <i>sadB</i> and <i>sadA</i> genes fused with the gene of 3 $\times$ Flag-tag                                                                            | This work           |
| pSadBA-FU2                      | pTrc99A derivative containing <i>sadB</i> and <i>sadA</i> genes fused with genes of 3 $\times$ Flag-tag, UreB158-172 and UreB349–363 from <i>H. pylori</i> SS1                        | This work           |
| pSadBA <sup>1292</sup> -FU2     | pTrc99A derivative containing <i>sadB</i> and <i>sadA</i> <sup>1292-1462aa</sup> genes fused with genes of 3 $\times$ Flag-tag, UreB158-172 and UreB349–363 from <i>H. pylori</i> SS1 | This work           |
| pSadBA <sup>1171</sup> -FU2     | pTrc99A derivative containing <i>sadB</i> and <i>sadA</i> <sup>1171-1462aa</sup> genes fused with genes of 3 $\times$ Flag-tag, UreB158-172 and UreB349–363 from <i>H. pylori</i> SS1 | This work           |
| pSadBA <sup>877</sup> -FU2      | pTrc99A derivative containing <i>sadB</i> and <i>sadA</i> <sup>877-1462aa</sup> genes fused with genes of 3 $\times$ Flag-tag, UreB158-172 and UreB349–363 from <i>H. pylori</i> SS1  | This work           |
| pSadBA <sup>644</sup> -FU2      | pTrc99A derivative containing <i>sadB</i> and <i>sadA</i> <sup>644-1462aa</sup> genes fused with genes of 3 $\times$ Flag-tag, UreB158-172 and UreB349–363 from <i>H. pylori</i> SS1  | This work           |
| pSadBA <sup>269</sup> -FU2      | pTrc99A derivative containing <i>sadB</i> and <i>sadA</i> <sup>269-1462aa</sup> genes fused with genes of 3 $\times$ Flag-tag, UreB158-172 and UreB349–363 from <i>H. pylori</i> SS1  | This work           |
| pSadBA-FU2                      | pTrc99A derivative containing <i>sadB</i> and <i>sadA</i> genes fused with genes of 3 $\times$ Flag-tag, UreB158-172 and UreB349–363 from <i>H. pylori</i> SS1                        | This work           |
| pSadBA <sup>1292</sup> -FM      | pTrc99A derivative containing <i>sadB</i> and <i>sadA</i> <sup>1292-1462aa</sup>                                                                                                      | This work           |

|                              |                                                                                                                                                                                                                   |                |
|------------------------------|-------------------------------------------------------------------------------------------------------------------------------------------------------------------------------------------------------------------|----------------|
| pSadBA <sup>1292</sup> -FUM  | genes fused with genes of 3×Flag-tag and mScarlet<br><i>pTrc99A</i> derivative containing <i>sadB</i> and <i>sadA</i> <sup>1292-1462aa</sup>                                                                      | This work      |
| pSadBA <sup>1292</sup> -FUPM | genes fused with genes of 3×Flag-tag, UreBm (111-376 aa) and mScarlet<br><i>pTrc99A</i> derivative containing <i>sadB</i> and <i>sadA</i> <sup>1292-1462aa</sup>                                                  | This work      |
| pSadBA <sup>877</sup> -FM    | genes fused with genes of 3×Flag-tag and mScarlet<br><i>pTrc99A</i> derivative containing <i>sadB</i> and <i>sadA</i> <sup>877-1462aa</sup>                                                                       | This work      |
| pSadBA <sup>877</sup> -FUM   | genes fused with genes of 3×Flag-tag, UreBm (111-376 aa) and mScarlet<br><i>pTrc99A</i> derivative containing <i>sadB</i> and <i>sadA</i> <sup>877-1462aa</sup>                                                   | This work      |
| pSadBA <sup>877</sup> -FUPM  | genes fused with genes of 3×Flag-tag, UreB111-376 from <i>H. pylori</i> SS1, PAD4 from <i>B. anthracis</i> and mScarlet<br><i>pTrc99A</i> derivative containing <i>sadB</i> and <i>sadA</i> <sup>877-1462aa</sup> | This work      |
| pFM                          | <i>pTrc99A</i> derivative containing genes of 3×Flag-tag and mScarlet without an anchoring motif                                                                                                                  | This work      |
| pJOE-mScarlet                | Deriving from pJOE8999, from 1 to 2844 base pairs, carrying mScarlet coded sequence without promoter                                                                                                              | Lab collection |
| pCas                         | <i>repA101</i> (Ts), <i>kan</i> , <i>P<sub>cas</sub>-cas9</i> , <i>P<sub>araB</sub>-Red</i> , <i>P<sub>trc</sub>-sgRNA-pMB1</i> , used for <i>sadA</i> gene deletion                                              | Jiang etal.    |
| pTargetF- <i>sadA</i>        | <i>pMB1</i> , <i>aadA</i> : spectinomycin resistance gene, sgRNA- <i>sadA</i> , used for <i>sadA</i> gene deletion                                                                                                | Jiang etal.    |
| pTargetFA- <i>ygeA</i>       | <i>pMB1</i> , <i>bla</i> : ampicillin resistance gene, sgRNA- <i>ygeA</i> , used for <i>ygeA</i> gene deletion                                                                                                    | Jiang etal.    |
| pTargetFA- <i>murI</i>       | <i>pMB1</i> , <i>bla</i> : ampicillin resistance gene, sgRNA- <i>murI</i> , used for <i>murI</i> gene deletion                                                                                                    | Jiang etal.    |

---

Yu Jiang, Biao Chen, Chunlan Duan, Bingbing Sun, Junjie Yang, Sheng Yang. Multigene Editing in the Escherichia coli Genome via the CRISPR-Cas9 System. Appl Environ Microbiol, 2015, 81(7): 2506-14.

Table S2. Oligonucleotides used in this study.

| Name                                  | Sequence                                       | Target                                                                                                                                                                                      |
|---------------------------------------|------------------------------------------------|---------------------------------------------------------------------------------------------------------------------------------------------------------------------------------------------|
| <i>sadA</i> -F                        | CGGGATCCATGAATAGAATATTTAAAGTCCTCTGGAA          | <i>sadA</i> <sup>1-168</sup> - <i>flag</i> ×3-<br><i>sadA</i> <sup>169-990</sup> ; <i>sadA</i> <sup>1-168</sup> -<br><i>flag</i> ×3- <i>a3c10-a1h10</i> -<br><i>sadA</i> <sup>169-990</sup> |
| <i>sadA</i> <sup>1-990</sup> -R       | CTAGCTAGCGCTAAAGGCGCTGATGCTTT                  | <i>sadA</i> <sup>1-168</sup> - <i>flag</i> ×3-<br><i>sadA</i> <sup>169-990</sup> ; <i>sadA</i> <sup>1-168</sup> -<br><i>flag</i> ×3- <i>a3c10-a1h10</i> -<br><i>sadA</i> <sup>169-990</sup> |
| <i>sadA</i> <sup>991-4386</sup> -F    | CTAGCTAGCCACACGGGAAACGCCAGCAAAAT               | <i>sadA</i> <sup>991-4386</sup>                                                                                                                                                             |
| <i>sadA</i> -R                        | CCCAAGCTTTTACCACTGGAAGCCCGCG                   | <i>sadA</i> <sup>991-4386</sup>                                                                                                                                                             |
| <i>sadBA</i> -F                       | CCGGAATTCATGCACAAAAATGGAAAATTT                 | <i>sadB-sadA</i> <sup>1-168</sup> -<br><i>flag</i> ×3- <i>sadA</i> <sup>169-4386</sup>                                                                                                      |
| <i>sadBA</i> -R                       | ATCCTTGTAATCTGCGTTGGCCAGTGCATCCGCAGAA<br>ACC   | <i>sadB-sadA</i> <sup>1-168</sup> -<br><i>flag</i> ×3- <i>sadA</i> <sup>169-4386</sup>                                                                                                      |
| <i>sadBA-flag</i> ×3-F                | ACTGGCCAACGCAGATTACAAGGATGACGACGATAAGG         | <i>sadB-sadA</i> <sup>1-168</sup> -<br><i>flag</i> ×3- <i>sadA</i> <sup>169-4386</sup>                                                                                                      |
| <i>sadBA-flag</i> ×3-R                | <i>sadA</i> -R                                 | <i>sadB-sadA</i> <sup>1-168</sup> -<br><i>flag</i> ×3- <i>sadA</i> <sup>169-4386</sup>                                                                                                      |
| <i>sadBA</i> <sup>1292</sup> -FU2-1-F | <i>sadB</i> -F                                 | <i>sadBA</i> <sup>1292</sup> -FU2                                                                                                                                                           |
| <i>sadBA</i> <sup>1292</sup> -FU2-1-R | GTTCACCCCTGCACTTCCTCCTCCTCCGATAGTAG            | <i>sadBA</i> <sup>1292</sup> -FU2                                                                                                                                                           |
| <i>sadBA</i> <sup>1292</sup> -FU2-2-F | GGAGGAGGAAGTGCAGGGGTGAACAACACTGA               | <i>sadBA</i> <sup>1292</sup> -FU2                                                                                                                                                           |
| <i>sadBA</i> <sup>1292</sup> -FU2-2-R | <i>sadA</i> -R                                 | <i>sadBA</i> <sup>1292</sup> -FU2                                                                                                                                                           |
| <i>sadBA</i> <sup>1171</sup> -FU2-1-F | <i>sadB</i> -F                                 | <i>sadBA</i> <sup>1171</sup> -FU2                                                                                                                                                           |
| <i>sadBA</i> <sup>1171</sup> -FU2-1-R | TGCCGAACCCGCACTTCCTCCTCCTCCGATAGTAG            | <i>sadBA</i> <sup>1171</sup> -FU2                                                                                                                                                           |
| <i>sadBA</i> <sup>1171</sup> -FU2-2-F | GGAGGAGGAAGTGCAGGGTTCGGCAGATACCGAT             | <i>sadBA</i> <sup>1171</sup> -FU2                                                                                                                                                           |
| <i>sadBA</i> <sup>1171</sup> -FU2-2-R | <i>sadA</i> -R                                 | <i>sadBA</i> <sup>1171</sup> -FU2                                                                                                                                                           |
| <i>sadBA</i> <sup>877</sup> -FU2-1-F  | <i>sadB</i> -F                                 | <i>sadBA</i> <sup>877</sup> -FU2                                                                                                                                                            |
| <i>sadBA</i> <sup>877</sup> -FU2-1-R  | GATTTACCTGCACTTCCTCCTCCTCCGATAGTAG             | <i>sadBA</i> <sup>877</sup> -FU2                                                                                                                                                            |
| <i>sadBA</i> <sup>877</sup> -FU2-2-F  | GGAGGAGGAAGTGCAAGGTGAAATCGCCAGTGA              | <i>sadBA</i> <sup>877</sup> -FU2                                                                                                                                                            |
| <i>sadBA</i> <sup>877</sup> -FU2-2-R  | <i>sadA</i> -R                                 | <i>sadBA</i> <sup>877</sup> -FU2                                                                                                                                                            |
| <i>sadA</i> <sup>644</sup> -FU2-1-F   | <i>sadB</i> -F                                 | <i>sadBA</i> <sup>644</sup> -FU2                                                                                                                                                            |
| <i>sadBA</i> <sup>644</sup> -FU2-1-R  | CAGGGTGCCCGCACTTCCTCCTCCTCCGATAGTAG            | <i>sadBA</i> <sup>644</sup> -FU2                                                                                                                                                            |
| <i>sadBA</i> <sup>644</sup> -FU2-2-F  | GGAGGAGGAAGTGCAGGGCACCCCTGGCCGCGGACA           | <i>sadBA</i> <sup>644</sup> -FU2                                                                                                                                                            |
| <i>sadBA</i> <sup>644</sup> -FU2-2-R  | <i>sadA</i> -R                                 | <i>sadBA</i> <sup>644</sup> -FU2                                                                                                                                                            |
| <i>sadBA</i> <sup>269</sup> -FU2-1-F  | <i>sadB</i> -F                                 | <i>sadBA</i> <sup>269</sup> -FU2                                                                                                                                                            |
| <i>sadBA</i> <sup>269</sup> -FU2-1-R  | CTATTAACGGAAGCACTTCCTCCTCCTCCGATAGTAG          | <i>sadBA</i> <sup>269</sup> -FU2                                                                                                                                                            |
| <i>sadBA</i> <sup>269</sup> -FU2-2-F  | GGAGGAGGAAGTGCTTCCGTTAATAGTGATGGTA             | <i>sadBA</i> <sup>269</sup> -FU2                                                                                                                                                            |
| <i>sadBA</i> <sup>269</sup> -FU2-2-R  | <i>sadA</i> -R                                 | <i>sadBA</i> <sup>269</sup> -FU2                                                                                                                                                            |
| <i>sadBA</i> -FU2-1-F                 | <i>sadB</i> -F                                 | <i>sadBA</i> -FU2                                                                                                                                                                           |
| <i>sadBA</i> -FU2-1-R                 | TGTATCGTTTCCACTTCCTCCTCCTCCGATAGTAGTCG<br>CGTT | <i>sadBA</i> -FU2                                                                                                                                                                           |
| <i>sadBA</i> -FU2-2-F                 | ATCGGAGGAGGAGGAAGTGGAACGATACAGGCGAC            | <i>sadBA</i> -FU2                                                                                                                                                                           |

|                                                |                                               |                                            |
|------------------------------------------------|-----------------------------------------------|--------------------------------------------|
|                                                | GGC                                           |                                            |
| <i>sadBA-FU2-2-R</i>                           | <i>sadA-R</i>                                 | <i>sadBA-FU2</i>                           |
| <i>sadBA</i> <sup>1292</sup> - <i>FM-1-F</i>   | <i>sadB-F</i>                                 | <i>sadBA</i> <sup>1292</sup> - <i>FM</i>   |
| <i>sadBA</i> <sup>1292</sup> - <i>FM-1-R</i>   | ACCTTTAGATACACTTCCTCCTCCTCCTTTA               | <i>sadBA</i> <sup>1292</sup> - <i>FM</i>   |
| <i>sadBA</i> <sup>1292</sup> - <i>FM-2-F</i>   | AGGAGGAGGAAGTGTATCTAAAGGTGAAGCAGTAA           | <i>sadBA</i> <sup>1292</sup> - <i>FM</i>   |
| <i>sadBA</i> <sup>1292</sup> - <i>FM-2-R</i>   | ACTTCCTCCTCCTCCTTTGTATAATTCATCCAT             | <i>sadBA</i> <sup>1292</sup> - <i>FM</i>   |
| <i>sadBA</i> <sup>1292</sup> - <i>FM-3-F</i>   | GATGAATTATACAAAGGAGGAGGAGGAAGTGCA             | <i>sadBA</i> <sup>1292</sup> - <i>FM</i>   |
| <i>sadBA</i> <sup>1292</sup> - <i>FM-3-R</i>   | <i>sadA-R</i>                                 | <i>sadBA</i> <sup>1292</sup> - <i>FM</i>   |
| <i>sadBA</i> <sup>1292</sup> - <i>FUM-1-F</i>  | <i>sadB-F</i>                                 | <i>sadBA</i> <sup>1292</sup> - <i>FUM</i>  |
| <i>sadBA</i> <sup>1292</sup> - <i>FUM-1-R</i>  | ACGCTAAGATTACTTCCTCCTCCTCCTTT                 | <i>sadBA</i> <sup>1292</sup> - <i>FUM</i>  |
| <i>sadBA</i> <sup>1292</sup> - <i>FUM-2-F</i>  | GAGGAGGAAGTAATCTTAGCGTGGGTCCTGCTA             | <i>sadBA</i> <sup>1292</sup> - <i>FUM</i>  |
| <i>sadBA</i> <sup>1292</sup> - <i>FUM-2-R</i>  | CTTTAGATACACTTCCTCCTCCTCCCCAAGTTCTAGTG        | <i>sadBA</i> <sup>1292</sup> - <i>FUM</i>  |
|                                                | ATAA                                          |                                            |
| <i>sadBA</i> <sup>1292</sup> - <i>FUM-3-F</i>  | TAGAACTTGGGGAGGAGGAGGAAGTGTATCTAAAGG          | <i>sadBA</i> <sup>1292</sup> - <i>FUM</i>  |
|                                                | TGAAGCA                                       |                                            |
| <i>sadBA</i> <sup>1292</sup> - <i>FUM-3-R</i>  | <i>sadA-R</i>                                 | <i>sadBA</i> <sup>1292</sup> - <i>FUM</i>  |
| <i>sadBA</i> <sup>1292</sup> - <i>FUPM-1-F</i> | <i>sadB-F</i>                                 | <i>sadBA</i> <sup>1292</sup> - <i>FUPM</i> |
| <i>sadBA</i> <sup>1292</sup> - <i>FUPM-1-R</i> | TCATAATGAAA                                   | <i>sadBA</i> <sup>1292</sup> - <i>FUPM</i> |
|                                                | ACTTCCTCCTCCTCCTTTATCGTCATCATC                |                                            |
| <i>sadBA</i> <sup>1292</sup> - <i>FUPM-2-F</i> | <i>sadBA</i> <sup>1292</sup> - <i>FUM-2-F</i> | <i>sadBA</i> <sup>1292</sup> - <i>FUPM</i> |
| <i>sadBA</i> <sup>1292</sup> - <i>FUPM-2-R</i> | TGAAAACCTTCCTCCTCCTCCCCAAGTTCTAGTGATAA        | <i>sadBA</i> <sup>1292</sup> - <i>FUPM</i> |
| <i>sadBA</i> <sup>1292</sup> - <i>FUPM-3-F</i> | TTGGGGAGGAGGAGGAAGTTTTTCATTATGATAGAAAT        | <i>sadBA</i> <sup>1292</sup> - <i>FUPM</i> |
|                                                | AACA                                          |                                            |
| <i>sadBA</i> <sup>1292</sup> - <i>FUPM-3-R</i> | GATACACTTCCTCCTCCTCCTCCTATCTCATAGCCTT         | <i>sadBA</i> <sup>1292</sup> - <i>FUPM</i> |
| <i>sadBA</i> <sup>1292</sup> - <i>FUPM-4-F</i> | TAGGAGGAGGAGGAGGAAGTGTATCTAAAGGTGAAG          | <i>sadBA</i> <sup>1292</sup> - <i>FUPM</i> |
|                                                | CA                                            |                                            |
| <i>sadBA</i> <sup>1292</sup> - <i>FUPM-4-R</i> | <i>sadA-R</i>                                 | <i>sadBA</i> <sup>1292</sup> - <i>FUPM</i> |
| <i>sadBA</i> <sup>877</sup> - <i>FM-1-F</i>    | <i>sadB-F</i>                                 | <i>sadBA</i> <sup>877</sup> - <i>FM</i>    |
| <i>sadBA</i> <sup>877</sup> - <i>FM-1-R</i>    | TTTCACCTGCACTTCCTCCTCCTCC                     | <i>sadBA</i> <sup>877</sup> - <i>FM</i>    |
|                                                | TTTGTATAATTCATCC                              |                                            |
| <i>sadBA</i> <sup>877</sup> - <i>FM-2-F</i>    | GAGGAGGAAGTGCAGGTGAAATCGCCAGT                 | <i>sadBA</i> <sup>877</sup> - <i>FM</i>    |
| <i>sadBA</i> <sup>877</sup> - <i>FM-2-R</i>    | <i>sadA-R</i>                                 | <i>sadBA</i> <sup>877</sup> - <i>FM</i>    |
| <i>sadBA</i> <sup>877</sup> - <i>FUM-1-F</i>   | <i>sadB-F</i>                                 | <i>sadBA</i> <sup>877</sup> - <i>FUM</i>   |
| <i>sadBA</i> <sup>877</sup> - <i>FUM-1-R</i>   | <i>sadBA</i> <sup>1292</sup> - <i>FUM-1-R</i> | <i>sadBA</i> <sup>877</sup> - <i>FUM</i>   |
| <i>sadBA</i> <sup>877</sup> - <i>FUM-2-F</i>   | <i>sadBA</i> <sup>1292</sup> - <i>FUM-2-F</i> | <i>sadBA</i> <sup>877</sup> - <i>FUM</i>   |
| <i>sadBA</i> <sup>877</sup> - <i>FUM-2-R</i>   | <i>sadBA</i> <sup>1292</sup> - <i>FUM-2-R</i> | <i>sadBA</i> <sup>877</sup> - <i>FUM</i>   |
| <i>sadBA</i> <sup>877</sup> - <i>FUM-3-F</i>   | <i>sadBA</i> <sup>1292</sup> - <i>FUM-3-F</i> | <i>sadBA</i> <sup>877</sup> - <i>FUM</i>   |
| <i>sadBA</i> <sup>877</sup> - <i>FUM-3-R</i>   | <i>sadA-R</i>                                 | <i>sadBA</i> <sup>877</sup> - <i>FUM</i>   |
| <i>sadBA</i> <sup>877</sup> - <i>FUPM-1-F</i>  | <i>sadB-F</i>                                 | <i>sadBA</i> <sup>877</sup> - <i>FUM</i>   |
| <i>sadBA</i> <sup>877</sup> - <i>FUPM-1-R</i>  | <i>sadBA</i> <sup>877</sup> - <i>FM-1-R</i>   | <i>sadBA</i> <sup>877</sup> - <i>FUM</i>   |
| <i>sadBA</i> <sup>877</sup> - <i>FUPM-2-F</i>  | <i>sadBA</i> <sup>877</sup> - <i>FM-2-F</i>   | <i>sadBA</i> <sup>877</sup> - <i>FUM</i>   |
| <i>sadBA</i> <sup>877</sup> - <i>FUPM-2-R</i>  | <i>sadA-R</i>                                 | <i>sadBA</i> <sup>877</sup> - <i>FUM</i>   |
| Up- <i>sadA-F</i>                              | AACACAACCAAAAAGGTCACCGAAGTCG                  | Upstream homologous<br>arm of <i>sadA</i>  |

|                              |                                      |                                          |
|------------------------------|--------------------------------------|------------------------------------------|
| Up- <i>sadA</i> -R           | GTTGTTACTTCAGAATGAGTAATTCCT          | Upstream homologous arm of <i>sadA</i>   |
| Down- <i>sadA</i> -F         | ATTACTCATTCTGAAGTAACAACACTCCC        | Downstream homologous arm of <i>sadA</i> |
| Down- <i>sadA</i> -R         | CGCGTGATCGACCGGCATTTTTATAGAACA       | Downstream homologous arm of <i>sadA</i> |
| $\Delta$ <i>sadA</i> -test-F | CTTATATCCCGCAGAATATG                 | Test for <i>sadA</i> gene deletion       |
| $\Delta$ <i>sadA</i> -test-R | GAATCTTTGCTCATCTCGTTG                | Test for <i>sadA</i> gene deletion       |
| <i>ygeA</i> -F               | GCGCCACGACTTAGGGCTGACGGAGA           | Test for homologous arm of <i>ygeA</i>   |
| <i>ygeA</i> -R               | CATTGGTGTGGGCTACTGCCTGATGCA          | Test for homologous arm of <i>ygeA</i>   |
| $\Delta$ <i>ygeA</i> -test-F | AATCCTTTTTGCCGCCGTTACTACCGCCTTTT     | Test for <i>ygeA</i> gene deletion       |
| $\Delta$ <i>ygeA</i> -test-R | TCAAACCTCAAGCAGGGAGGGTGGGCATTAT      | Test for <i>ygeA</i> gene deletion       |
| Up- <i>murI</i> -F           | GTCAGCTGGCGTATTTTCAGGTTATCGTAA       | Upstream homologous arm of <i>murI</i>   |
| Up- <i>murI</i> -R           | CCCAAAACGCCATCAGAAGGTGTAGCTGCCAGACA  | Upstream homologous arm of <i>murI</i>   |
| Down- <i>murI</i> -F         | TACACCTTCTGATGGCGTTTTGGGTAAATACCAGGC | Downstream homologous arm of <i>murI</i> |
| Down- <i>murI</i> -R         | GCGGTATTAGCCACCGTTTCCAGTAGTTA        | Downstream homologous arm of <i>murI</i> |
| $\Delta$ <i>murI</i> -test-F | TTTATTgCCTCCTACggAACCTCCTACAAA       | Test for <i>murI</i> gene deletion       |
| $\Delta$ <i>murI</i> -test-R | TAATTTCTCAAgTgCCTggTATTTACCCAAAACgC  | Test for <i>murI</i> gene deletion       |

---

Table S3. The commercial synthetic gene sequences and amino acid sequences of functional proteins parts used in this study.

|                                                                                                                                                                                                                                                                              |                                                                                                                                                                                                                                                                                                                                                                                                                                                                                                                                                                                                                                                                                                                                                                                                                                                                                                                                                                                                                                                                                                                                                                                                                                                                                                                                                                                                                                                                                                                                       |
|------------------------------------------------------------------------------------------------------------------------------------------------------------------------------------------------------------------------------------------------------------------------------|---------------------------------------------------------------------------------------------------------------------------------------------------------------------------------------------------------------------------------------------------------------------------------------------------------------------------------------------------------------------------------------------------------------------------------------------------------------------------------------------------------------------------------------------------------------------------------------------------------------------------------------------------------------------------------------------------------------------------------------------------------------------------------------------------------------------------------------------------------------------------------------------------------------------------------------------------------------------------------------------------------------------------------------------------------------------------------------------------------------------------------------------------------------------------------------------------------------------------------------------------------------------------------------------------------------------------------------------------------------------------------------------------------------------------------------------------------------------------------------------------------------------------------------|
| <p><i>sadA</i><sup>1-168</sup>-<i>flag</i>×3-</p> <p><i>sadA</i><sup>169-330</sup></p> <p>(green, <i>flag</i>×3)</p>                                                                                                                                                         | <p>atgaatagaatatttaaagtcctctggaatgccgctacgggaacatttgtgtcaccagcgaaacc</p> <p>gcaaaaagccggcgcaaaaaaacggccgcagaaagctggcagtttccgcactcatcggtctt</p> <p>agcagcattatggtttctgcggatgactggccaacgca</p> <p>gattacaaggatgacgacgataaagg</p> <p>actataaggacgatgatgacaaggactacaagatgatgacgataaagg</p> <p>gaaacgatacaggcg</p> <p>acggcggtactccaacgggtaccagactggaggaaaagggtggattgcaattggtaccgatgc</p> <p>cacagccaatacttacaccaacgttgatggcgcaagcgccgcaatgggtataaagcctccgcg</p> <p>atggggaaatggagtaccgccattggttctacagccagtcaccggcgactcttcgttagcgctt</p> <p>ggcgtaaaatcggttcagccgggtgaccgggccattgcaatggcgccctcatctcagccagt</p> <p>ggaagttattcaatggcaatggcggtgatgccaattcgagcgcgcaaaatcggttcggttaggtt</p> <p>ataaatctgtcgcgagcggagcaacttctctgcattaggttatcaagctactgcgagcggcgac</p> <p>gacagcgctgcttttgtaatggcgcaaaagcgataggcaccactcagttgcccttggctcggg</p> <p>ctctgtcggccaggaagacaattccgtcgccgtgggtaacagcaccactcagcggcagataacc</p> <p>tacgttgctaaaggcgacatcaattccaccagtaccgatgccgttacaggtgcgcaatttattctt</p> <p>aagtcaatccgtcgccgaccgactcggcgagggggttccgttaatagtgtggtacagtgaat</p> <p>gcgcccctctacaggttaggcacaggcactacaataacgtaggtagtgcattaagcgcacttaa</p> <p>cacgtctatcactaacagaggcctctgtcgcaggattagccgaagacgcgctgtgtgggatg</p> <p>aaagcatcagcgcccttagcgctagc</p>                                                                                                                                                                                                                                                                                             |
| <p><i>sadA</i><sup>1-168</sup>-<i>flag</i>×3-<i>a3c10</i>-</p> <p><i>alh10-sadA</i><sup>169-990</sup></p> <p>(green, <i>flag</i>×3; yellow,</p> <p>the gene of UreB349–</p> <p>363; blue, the gene of</p> <p>UreB158–172; red, the</p> <p>gene of linker</p> <p>(GGGGS))</p> | <p>atgaatagaatatttaaagtcctctggaatgccgctacgggaacatttgtgtcaccagcgaaacc</p> <p>gcaaaaagccggcgcaaaaaaacggccgcagaaagctggcagtttccgcactcatcggtctt</p> <p>agcagcattatggtttctgcggatgactggccaacgca</p> <p>gattacaaggatgacgacgataaagg</p> <p>actataaggacgatgatgacaaggactacaagatgatgacgataaagg</p> <p>GGAGGAGGAG</p> <p>GAAGTactttgcatgacatggggattttctcaatcactagtctgactctGGAGGAGGA</p> <p>GGAAGTgggtggcggaactggctcgtgatggcactaacgcgactactcGGAGGA</p> <p>GGAGGAAGTggaaacgatacaggcgacggcggttactccaacgggtaccagactgga</p> <p>gaaaagggtggattgcaattggtaccgatgccacagccaatacttacaccaacgttgatggcg</p> <p>caagcgccgcaatgggtataaagcctccgcgatggggaaatggagtaccgccattggttcta</p> <p>cagccagtccaccggcgactcttcgttagcgcttggcgtaaaatcggttcagccgggtgaccggg</p> <p>ccattgcaatggcgccctcatctcagccagtggaaagtattcaatggcaatggcggtgatgcca</p> <p>attcgagcggcgcaaaatcggttcgttaggtataaatctgtcgcgagcggagcaacttctctg</p> <p>cattaggttatcaagctactgcgagcggcgacgacagcgctgcttttgtaatggcgcaaaagcg</p> <p>ataggcaccactcagttgcccttggctcgggctctgtcggccaggaagacaattccgtcgccgt</p> <p>gggtaacagcaccactcagcggcgagataacctacgttgctaaaggcgacatcaattccaccagt</p> <p>accgatgccgttacaggtgcgcaaatatttctttaagtcaatccgtcgccgaccgactcggcgga</p> <p>ggggcttccgttaatagtgtggtacagtgaatgcgcccctctacaggttaggcacaggcactta</p> <p>caataacgtaggtagtgcattaagcgcacttaacacgtctatcactaacagaggcctctgtcgc</p> <p>aggattagccgaagacgcgctgtgtgggatgaaagcatcagcgcccttagcgctagc</p> <p>green, <i>flag</i>×3; yellow, the gene of UreB349-363; blue, the gene of</p> <p>UreB158-172; red, the gene of linker (GGGGS)</p> |
| <p>Donor DNA for deletion</p> <p>of <i>ygeA</i> gene</p>                                                                                                                                                                                                                     | <p>gcgccagacttagggctgacggagacgcttcatgccccggcaggaacaaccgtaccgagtt</p> <p>actaacgtgaatgaagtgtgcgtactgcctcgacatccgcttgcgcgaacgggtactga</p> <p>cggcagacgatttcagggggaaaactttatcagcctctcccgcctggacagctatcagagttgt</p>                                                                                                                                                                                                                                                                                                                                                                                                                                                                                                                                                                                                                                                                                                                                                                                                                                                                                                                                                                                                                                                                                                                                                                                                                                                                                                                       |

|                                                                                                                                                                                                                                                                                                                                                                                                                                 |                                                                                                                                                                                                                                                                                                                                                                                                                                                                                                                                                                                                                                                                                                                                                                                                                                                                                                                                                                                                                                                                                                              |
|---------------------------------------------------------------------------------------------------------------------------------------------------------------------------------------------------------------------------------------------------------------------------------------------------------------------------------------------------------------------------------------------------------------------------------|--------------------------------------------------------------------------------------------------------------------------------------------------------------------------------------------------------------------------------------------------------------------------------------------------------------------------------------------------------------------------------------------------------------------------------------------------------------------------------------------------------------------------------------------------------------------------------------------------------------------------------------------------------------------------------------------------------------------------------------------------------------------------------------------------------------------------------------------------------------------------------------------------------------------------------------------------------------------------------------------------------------------------------------------------------------------------------------------------------------|
|                                                                                                                                                                                                                                                                                                                                                                                                                                 | <p>             tggatacgttatttgcggaacatcaggtgaagcgcagaatggtggtggaacgcatagcgcggc<br/>             ctccgttcgcgcgatggtgcgcgccggggcggcggttcgatcgttaacccgctgaccgcgctg<br/>             gactatgccgccagcggcgctcaccgtccgcgcttcagcattgacgtgccctttaccgtcagcct<br/>             gattcggcgctacaccgccctgcctccgcgctggtgacgccttcagtaagcatttacaacgc<br/>             acctttcgcgcctggtcgaaccgctggagggtattctggggccgatgacgaaagcataaTgcgc<br/>             tctcctttttaaagcattatggcagtgaaagcaaaccttacatccggtttccagtcatttttcatcatg<br/>             ccggataacaggcgtcatccggcatgggaggggggattacagccaatatttcttagcttctcgc<br/>             ccgccatcagcttgcgttcgatgtgctccagggtgacatttttggtttccggaatcagccagaaagt<br/>             gatgccgataaaagcgataattcagcgcgggttagagccagaatgtacctgccgcgccaatgctg<br/>             tccaacagtgtaggaatgtcgcgcgatgatcatgttcgataccagttgtcgtggttgaacag<br/>             gtaatgcaaaatcacggcatttcagcggctggatttccgaacacagtatccacaccaggagac<br/>             ggcgctcatcgcgtaaccggcgatacacatcatcgtcatccaacggaaagccaggagagacc<br/>             gcttgatgccgtaccgttatcaactgcacagggcagtagcccaacaccaatg           </p> |
| UreBm                                                                                                                                                                                                                                                                                                                                                                                                                           | <p>             NLSVGPATEALAGEGLIVTAGGIDTHIHFIISPQQIPTAFASGVTT<br/>             MIGGGTGTPADGTNATTITPGRRLK WMLRAAEEYSMNLGFL<br/>             AKGNASNDASLADQIEAGAIGFKIHEDWGTTSPAINHALDVA<br/>             DKYDVQVAIHDTLNEAGCVEDTMAAIAGRTMHTFHTEGAG<br/>             GGHAPDIIKVAGEHNILPASTNPTIPFTVNTEAEHMDMLMVC<br/>             HHLDKSIKEDVQFADSRIRPQTIAAEDTLHDMGIFSITSSDSQA<br/>             MGRVGEVITRTW           </p>                                                                                                                                                                                                                                                                                                                                                                                                                                                                                                                                                                                                                                                                                      |
| PAD4                                                                                                                                                                                                                                                                                                                                                                                                                            | <p>             FHYDRNNIAVGADESVVKEAHREVINSSTEGLLL NIDKDIRKI<br/>             LSGYIVEIEDTEGLKEVINDRYDMLNISSLRQDGKTFIDFKKY<br/>             NDKLPLYISNPNYKVNVYAVTKENTIINPSENGDTSTNGIKIL<br/>             IFSKKGYEIG           </p>                                                                                                                                                                                                                                                                                                                                                                                                                                                                                                                                                                                                                                                                                                                                                                                                                                                                            |
| mScarlet                                                                                                                                                                                                                                                                                                                                                                                                                        | <p>             MVSKGEAVIKEFMRFKVHMEGSMNGHEFEIEGEGEGRPYEG<br/>             TQTAKLKVTKGGPLPFSWDILSPQFMYGSRAFTKHPADIPDY<br/>             YKQSFPEGFKWERVMNFEDGGAVTVTQDTSLEDGTLIYKVK<br/>             LRGTNFPDPGPVMQKKTMGWEASTERLYPEDGVLKGDIKM<br/>             ALRLKDGGRYLADFKTTYKAKKPVQMPGAYNVDRKLDITSH<br/>             NEDYTVVEQYERSEGRHSTGGMDELYK           </p>                                                                                                                                                                                                                                                                                                                                                                                                                                                                                                                                                                                                                                                                                                                                            |
| <p>SadA</p> <p>(<b>green</b>, signal peptide;<br/> <b>yellow</b>, A<sup>269</sup> (The<br/>             truncation point of<br/>             SadA<sup>269</sup>); <b>gray</b>, A<sup>644</sup><br/>             (The truncation point of<br/>             SadA<sup>644</sup>); <b>purple</b>, A<sup>877</sup><br/>             (The truncation point of<br/>             SadA<sup>877</sup>); <b>blue</b>, A<sup>1171</sup></p> | <p> <b>MNRIFKVLWNAATGTFVVTSETAKSRGKKNGRRKLAVSALIG</b><br/> <b>LSSIMVSADALANA</b>GNDTGDGVTPGTGTGKGWIAIGTDA<br/>             TANTYTNVDGASAAMGYKASAMGKWSTAIGSYSQSTGDSSL<br/>             ALGVKSVSAGDRAIAMGASSASGSYSMAMGVYANSSGAKS<br/>             VALGYKSVASGATSSALGYQATASGDDSAAFGNGAKAIGTNS<br/>             VALGSGSVAQEDNSVAVGNSTTQRQITYVAKGDINSTSTDAVT<br/>             GAQIYSLSQSVADRLGGG<b>A</b>SVNSDGTVNAPLYEVGTGIYNNV<br/>             GSALSALNTSITNTEASVAGLAEDALLWDESISAFSASHTGNA<br/>             SKITNLAAGTLAADSTDAVNGSQLFDTNEKVDKNTADIATNT<br/>             GSIQNQTADITANTDSINQNTTDIAANTTSINQNTTDIATNTTNI<br/>             NSLSDSVTTLTDDALLWDAASGAFAKHNGSDSKITNLAAGT<br/>             LAADSTDAVNGSQLFDTNEKVDQNTADITTNTNSINQNTTDI<br/>             ATNTTNINNLSDSITTLTDDALLWDAASGAFSANHNGSASKIT<br/>             NLAAGTLAADSTDAVNGSQLFATNENVSQNTADITTNTNSIN           </p>                                                                                                                                                                                                                            |

|                                                                                                                                                                               |                                                                                                                                                                                                                                                                                                                                                                                                                                                                                                                                                                                                                                                                                                                                                                                                                                                                                                                                                                                                                                                                                   |
|-------------------------------------------------------------------------------------------------------------------------------------------------------------------------------|-----------------------------------------------------------------------------------------------------------------------------------------------------------------------------------------------------------------------------------------------------------------------------------------------------------------------------------------------------------------------------------------------------------------------------------------------------------------------------------------------------------------------------------------------------------------------------------------------------------------------------------------------------------------------------------------------------------------------------------------------------------------------------------------------------------------------------------------------------------------------------------------------------------------------------------------------------------------------------------------------------------------------------------------------------------------------------------|
| <p>(The truncation point of SadA<sup>1171</sup>); <span style="background-color: red;">red</span>, A<sup>1292</sup></p> <p>(The truncation point of SadA<sup>1292</sup>))</p> | <p>QNTTDIATNTTSINNLSDSITTLTDDALLWDAASGTFASASRSGS<br/> ASKITNLAAGTLAADSTDAVNGSQLYETNQKVDQNTSAIADI<br/> NTSITNLSSDNLSWNETTSSFSASHGSSTTNKITNVAAGELSEE<br/> STDAVNGSQLFETNEKVDQNTTDIAANTTNITQNSTAIENLNT<br/> SVSDINTSITGLTDNALLWDEDTGAFSANHGGSTSKITNVAAG<br/> ALSEDSTDAVNGSQLYETNQKVDQNTSAIADINTSITNLGTDA<br/> LSWDDEEGAFSASHGTSGTNKITNVAAG<sup>red</sup>GEIASDSTDAVNGSQ<br/> LYETNMLISQYNESISQLAGDTSETYITENGTGVKYIRTNDNG<br/> LEGQDAYATGNGATAVGYDAVASGAGSLALGQNSSSSIEGSIA<br/> LGGSGTSNRAITTGIRETSATSDGVVIGYNTTDRELLGALS LGT<br/> DGESYRQITNVADGSEAQDAVTVRQLQNAIGAVTTTPTKYYH<br/> ANSTEEDSLAVGTDSLAMGAKTIVNADAGIGLNTLVMADA<br/> INGIAIGSNARANHANSIAMGNGSQTTRGAQTDYTAYNMDTP<br/> QNSVGEFSVGSEDGQRQITNVAAG<sup>red</sup>SADTDAVNVGQLKVTDA<br/> QVSRNTQSITNLNTQVSNLDTRVTNIENGIGDIVTTGSTKYFK<br/> TNTDGADANAQGADSVAGSGSIAAAENSVALGTNSVADEAN<br/> TVSVGSSTQRRITNVAAG<sup>red</sup>GVNNTDAVNVAQLKASEAGSVRY<br/> ETNADGSVNYSVLNLGDGSGGTTRIGNVSAAVNDTDAVNVA<br/> QLKRSVEEANTYTDQKMGE MNSKIKGVENKMSGGIASAMA<br/> MAGLPQAYAPGANMTSIAGGTFNGESAVAIGVSMVSESGGW<br/> VYKLQGTSNSQGDYSAAIGAGFQW*</p> |
|-------------------------------------------------------------------------------------------------------------------------------------------------------------------------------|-----------------------------------------------------------------------------------------------------------------------------------------------------------------------------------------------------------------------------------------------------------------------------------------------------------------------------------------------------------------------------------------------------------------------------------------------------------------------------------------------------------------------------------------------------------------------------------------------------------------------------------------------------------------------------------------------------------------------------------------------------------------------------------------------------------------------------------------------------------------------------------------------------------------------------------------------------------------------------------------------------------------------------------------------------------------------------------|



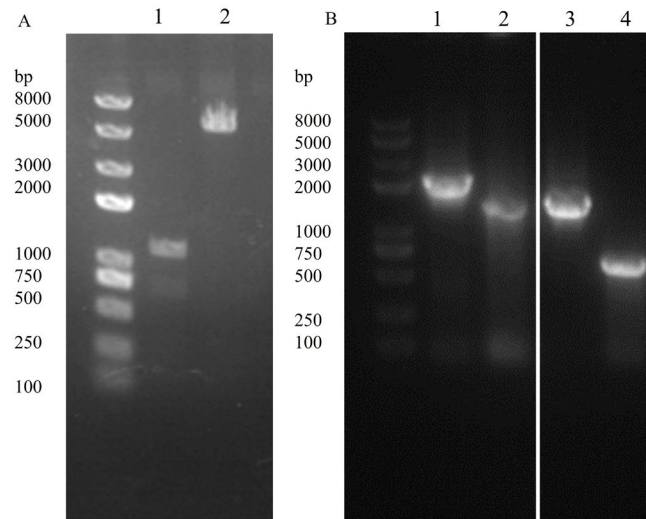

**Figure S1.** The *sadA*-deleted *S. typhimurium* and *ygeA-murI*-double-deleted *S. typhimurium* were confirmed by PCR. (A) PCR test for *sadA* gene of *StmΔsadA* (lane1, 1274 bp) and wild-type strain (lane2, 5660 bp) using specific primers. (B) PCR test for *sadA* gene of *StmΔygeAΔmurI* strain and wild-type strain. Lane1, PCR product containing *ygeA* amplified from wild-type stain (2115 bp); lane2, PCR product containing *ygeA* amplified from *StmΔygeAΔmurI* (1407 bp); lane3, PCR product containing *murI* amplified from wild-type stain (1446 bp); lane4, PCR product containing *murI* amplified from *StmΔygeAΔmurI* (594 bp).

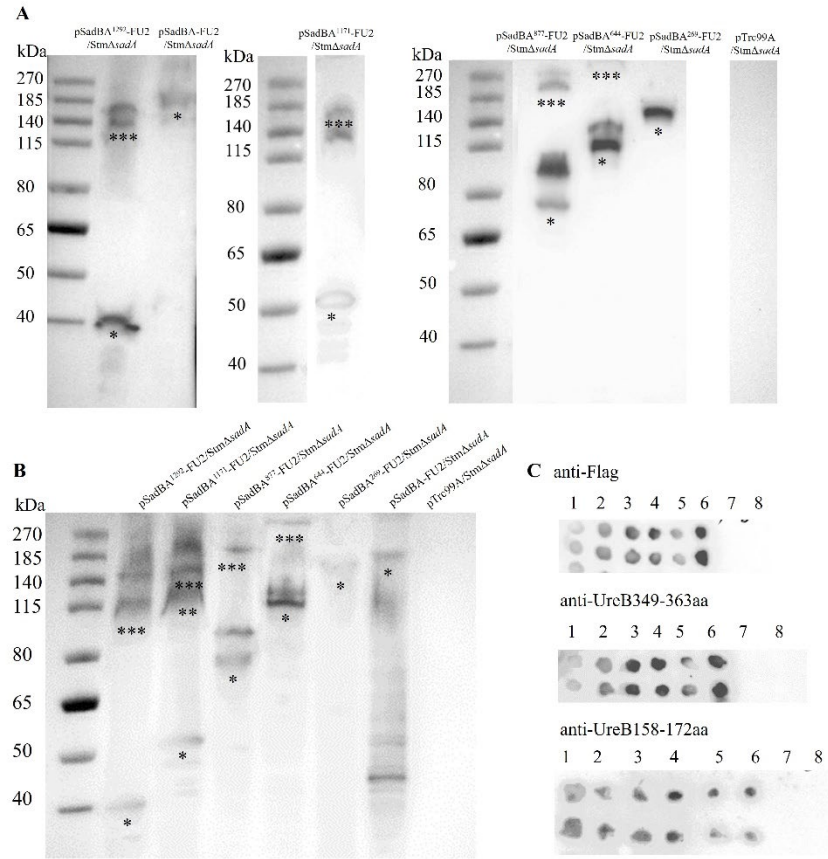

**Figure S2.** Western blot and dot blot of the displaying epitopes on the cell surface using full-length and truncated SadAs. Western blot showed that fused epitopes could be expressed in the StmΔsadA using the antibodies against UreB158–172aa (A1H10, A) and UreB349–363aa (A3C10, B). The putative positions of monomeric (\*), dimeric (\*\*) and trimeric (\*\*\*) complexes was indicated under the bands. Dot blot of whole cells to analyze the surface-display of SadA derivatives on StmΔsadA (C). Lane1, pSadBA<sup>1292</sup>-FU2/StmΔsadA; lane2, pSadBA<sup>1171</sup>-FU2/StmΔsadA; lane3, pSadBA<sup>877</sup>-FU2/StmΔsadA; lane4, pSadBA<sup>644</sup>-FU2/StmΔsadA; lane5, pSadBA<sup>269</sup>-FU2/StmΔsadA; lane6, pSadBA-FU2/StmΔsadA; lane7, pTrc99A/StmΔsadA; lane8, pFM/StmΔsadA.

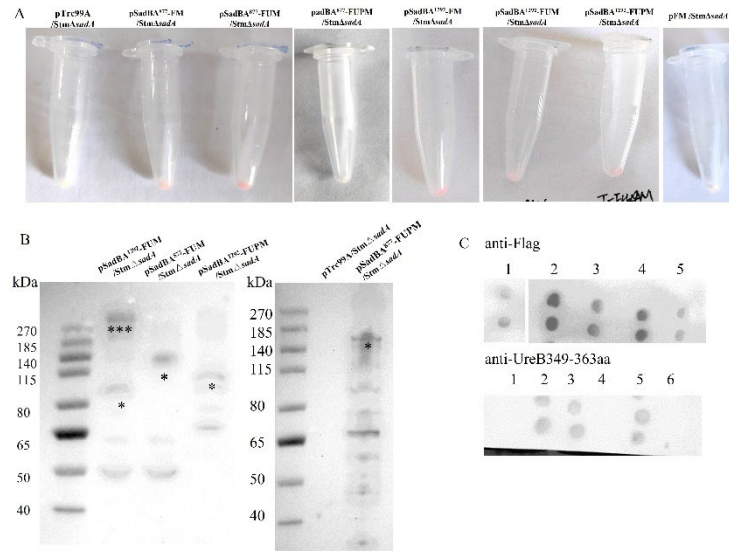

**Figure S3.** Confirmation of recombinant proteins displaying on the surface of cells using truncated SadAs as an anchoring motif. Compared with pTrc99A/StmΔsadA, pSadBA<sup>1292</sup>-FM/StmΔsadA, pSadBA<sup>1292</sup>-FUM/StmΔsadA, pSadBA<sup>1292</sup>-FUPM/StmΔsadA, pSadBA<sup>877</sup>-FM/StmΔsadA, pSadBA<sup>877</sup>-FUM/StmΔsadA, pSadBA<sup>877</sup>-FUPM/StmΔsadA and pFM/StmΔsadA showed a pink color due the expression of mScarlet after induced with IPTG (A). Western blot showed that fused proteins could be expressed in the StmΔsadA using the antibodies against UreB158–172aa(B). The putative positions of monomeric (\*) and trimeric (\*\*\*) complexes was indicated under the bands. Dot blot of whole cells to analyze display of recombinant proteins on StmΔsadA using A3C10 as the primary antibody (C). Lane1, pSadBA<sup>1292</sup>-FM/StmΔsadA; lane2, pSadBA<sup>1292</sup>-FUM/StmΔsadA; lane3, pSadBA<sup>1292</sup>-FUPM/StmΔsadA; lane4, pSadBA<sup>877</sup>-FM/StmΔsadA; lane5, pSadBA<sup>877</sup>-FUM/StmΔsadA; lane6, pTrc99A/StmΔsadA.

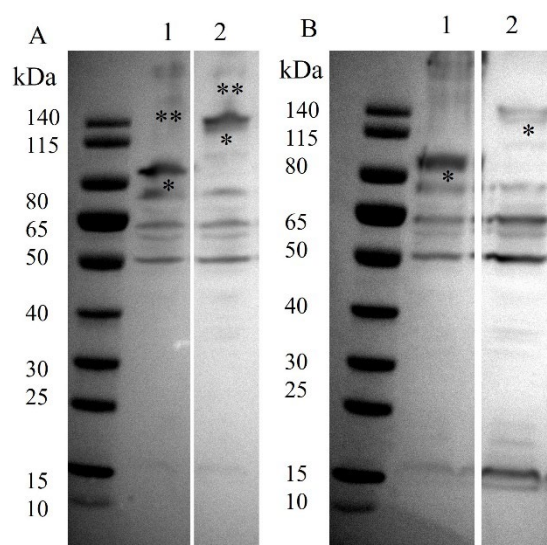

**Figure S4.** Western blot of heterologous proteins expressed in *StmΔygeAΔmurI* using the antibodies against Flag tag (A) and UreB158–172aa(B). Lane1, pSadBA<sup>1292</sup>-FUM/ *StmΔygeAΔmurI* , lane2, pSadBA<sup>877</sup>-FUM/*StmΔygeAΔmurI*. The putative positions of monomeric (\*) and dimeric (\*\*) complexes was indicated under the bands.

pSadBA<sup>1292</sup>-FUM/Stm $\Delta$ ygeA $\Delta$ murI

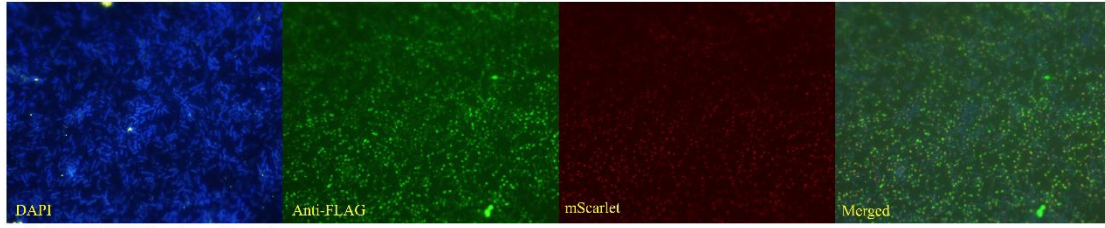

pSadBA<sup>877</sup>-FUM/Stm $\Delta$ ygeA $\Delta$ murI

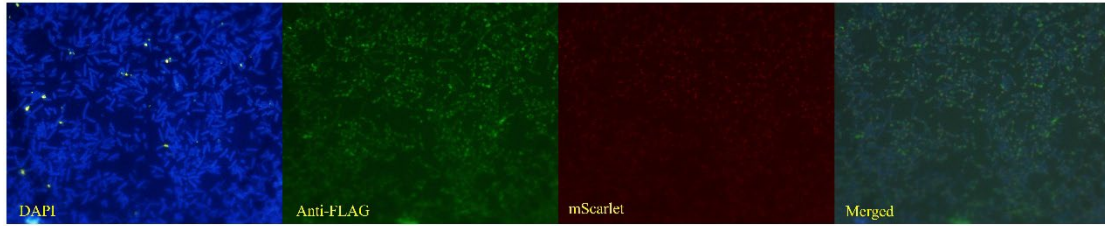

Stm $\Delta$ ygeA $\Delta$ murI

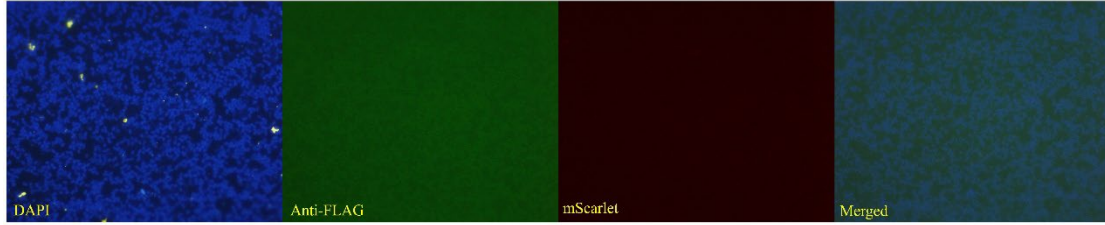

**Figure S5.** Cell surface display of Flag-tagged SadA derivatives on Stm $\Delta$ ygeA $\Delta$ murI by immunofluorescence staining using anti-Flag-tag primary antibody and Alexa Fluor 488 conjugated secondary antibody (Objective, 100 $\times$ ; Magnification, 1000 $\times$ ).
